# Supplementary material for: A Comparison of Hemostatic Activities of Zeolite-Based Formulary Finishes on Cotton Dressings
Source: J Funct Biomater. 2023 May 4;14(5):255. doi: 10.3390/jfb14050255 (PMC10219473; doi:10.3390/jfb14050255)
Supplement: Supplementary file 1 [file jfb-14-00255-s001.zip › jfb-2226151-SI.pdf]

Supplementary

# A Comparison of Hemostatic Activities of Zeolite-Based Formulary Finishes on Cotton Dressings

J. Vincent Edwards \*, Nicolette T. Prevost and Michael Santiago Cintron

Southern Regional Research Center, United States Department of Agriculture (USDA),  
Agricultural Research Service, New Orleans, LA 70124, USA

\* Correspondence: vince.edwards@usda.gov

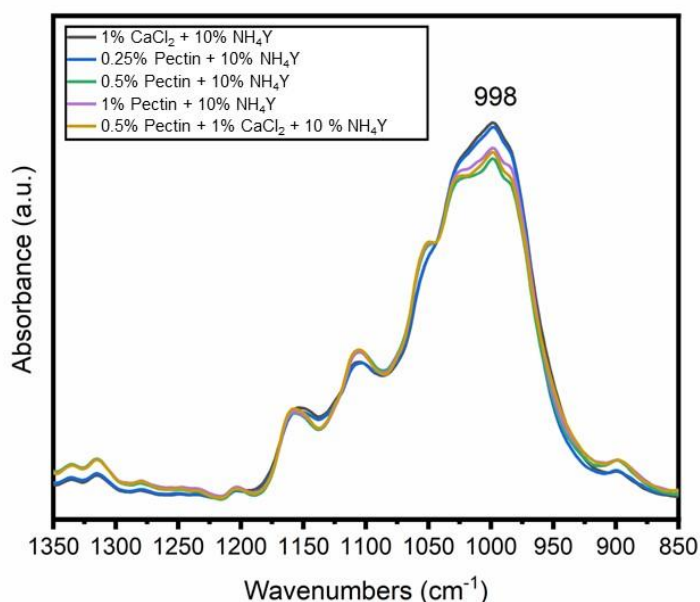

**Figure S1.** FTIR spectra of TGz fabrics treated with NH<sub>4</sub>Y zeolite and various amounts of the pectin and CaCl<sub>2</sub>. Spectra are presented normalized to 1050 cm<sup>-1</sup> and as the average of 4 examination spots. A relative increase in the intensity of the 998 cm<sup>-1</sup> peak is observed for gauze fabrics following treatment with NH<sub>4</sub>Y zeolite and one other component.

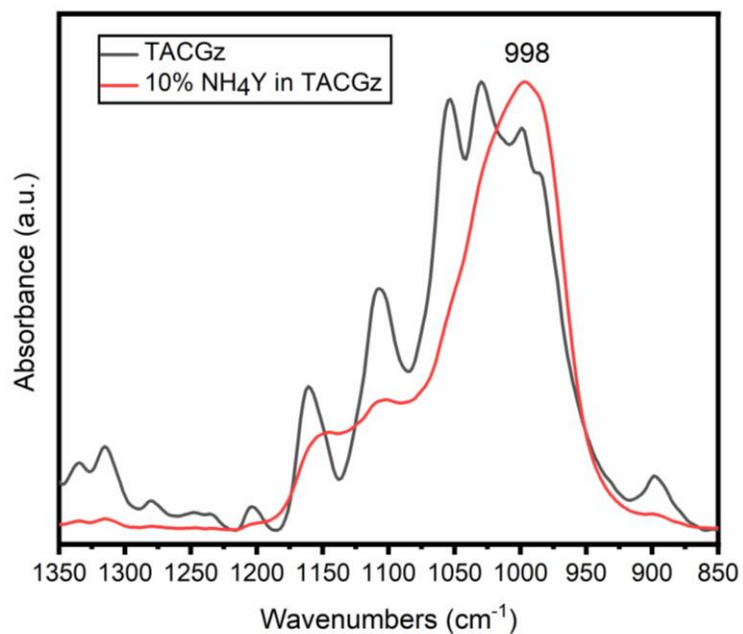

**Figure S2.** FTIR spectra of a TACGz gauze (black trace) and of NH<sub>4</sub>Y zeolite on the gauze (red trace). Spectra are presented normalized to their highest peak, and as the average of 4 examination spots.

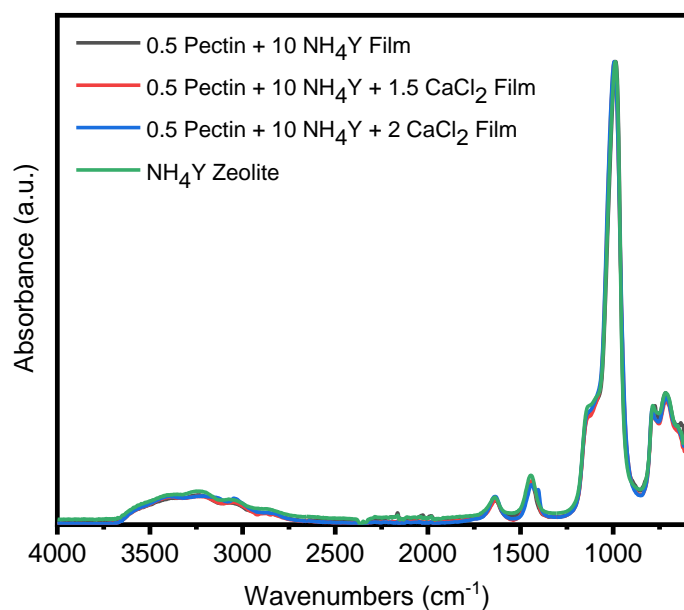

**Figure S3.** FTIR of ammonium Y zeolite(10%) and pectin(0.5%) films with/without addition of calcium chloride 1.5% and 2% respectively, and the zeolite powder control. This is the full spectrum of 6b.
